# Supplementary material
Source: publisher figshare collection journal article supplement (https://karger.figshare.com/ndownloader/files/27958833)
Supplement: Supplementary file 1 [file 27958833]

**Suplementary Table 2: Excluded articles with reason**

| **Article** | **Reason for exclusion** |
| --- | --- |
| Falls among community-dwelling older adults in Ethiopia; A preliminary cross-sectional study | Assessing falls |
| Pattern and appropriateness of medicines Prescribed to outpatients at a University hospital in Northwestern Ethiopia | Not reported the prevalence of PIM use and polypharmacy in older population |
| Eye care service utilization and associated factors among older adults in Hawassa city, South Ethiopia | Not reported the PIM use and polypharmacy in older population |
| Assessing falls risk and associated factors among urban community dwellers older adults in Gondar town, Northwest Ethiopia 2019: A cross sectional study | Assessing falls |
| Prevalence of depression and associated factors among older adults at ambo town, Oromia region, Ethiopia | Not reported the prevalence of PIM use and polypharmacy in older population |
| Prevalence of old age hypertension and associated factors among older adults in rural Ethiopia | Not reported the prevalence of PIM use and polypharmacy in older population |
| Inappropriate prescribing of antithrombotics causes poor discharge outcomes in hospitalized elderly patients using stopp/start criteria 2015, a retrospective cohort study | Duplicate study |
| Drug Therapy Problems and the Role of Clinical Pharmacist in Surgery Ward: Prospective Observational and Interventional Study | Not reported the prevalence of PIM use and polypharmacy in older population |
| Comparative evaluation of drug prescription appropriateness in public and private health Institutions of south west ethiopia: the case of wolkite town | Not reported the prevalence of PIM use and polypharmacy in older population |
| Drug Therapy Problem among Patients with Cardiovascular Diseases in Felege Hiwot Referral Hospital, North East, Ethiopia | Not reported the prevalence of PIM use and polypharmacy in older population |
| Assessment of Drug-Drug Interaction in Ayder Comprehensive Specialized Hospital, Mekelle, Northern Ethiopia: A Retrospective Study | Reported only the polypharmacy and drug-drug interactions |
| Barriers to diabetes medication adherence in North West Ethiopia | Reported barriers for medication adherence |
| Inappropriate Use of Antibiotics and Its Associated Factors among Urban and Rural Communities of Bahir Dar City Administration, Northwest Ethiopia | Antibiotics use |
| Inappropriate Use of Antimicrobials and the Determinants among Patients Hospitalized in 3 Hospitals (Mizan, Bonga and Tepi) in Southwest Ethiopia | Antibiotics use |
| Medication Administration Error and Associated Factors among Nurses in Referral Hospitals, Amhara region, Ethiopia, 2019 | Medication errors |
| Pharmacists’ Knowledge and Practice of Issues Related to Using Psychotropic Medication in Elderly People in Ethiopia: A Prospective Cross-Sectional Study | Knowledge about medication use in older patients |
| Older patients’ perception of deprescribing in resource-limited settings: a cross-sectional study in an Ethiopia university hospital | Deprescribing in older patients |
